# Supplementary material
Source: MDPI journal article supplement (https://www.mdpi.com/2073-4344/12/7/689)
Supplement: s1 [file s1 › catalysts-1722453-supplementary.pdf]

# *Supporting Materials*

## **Mechanistic and Experimental Study of the $\text{Cu}_x\text{O}@\text{C}$ Nanocomposite derived from $\text{Cu}_3(\text{BTC})_2$ for $\text{SO}_2$ Removal**

**Rudi Duan<sup>1</sup>, Weibin Chen<sup>1</sup>, Ziwei Chen<sup>1</sup>, Jialiang Gu<sup>1</sup>, Zhaoqi Dong<sup>1</sup>, Beini He<sup>1</sup>, Lili Liu<sup>1,2</sup>, Xidong Wang<sup>1,2\*</sup>**

<sup>1</sup> College of Engineering, Peking University, 5 Yiheyuan Road, Beijing, 100871, China.

<sup>2</sup> School of Materials Science and Engineering, Peking University, 5 Yiheyuan Road, Beijing, 100871, China.

\* Correspondence: E-mail: xidong@pku.edu.cn;

**Figure S1:** SEM image of  $\text{Cu}_3(\text{BTC})_2$  precursors.

**Figure S2:** SEM image of  $\text{CuO-NC}$ .

**Figure S3:** A schematic flow chart of dynamic adsorption desulfurization system.

**Table. S1:** Porosity characteristics of nano-CuOs.

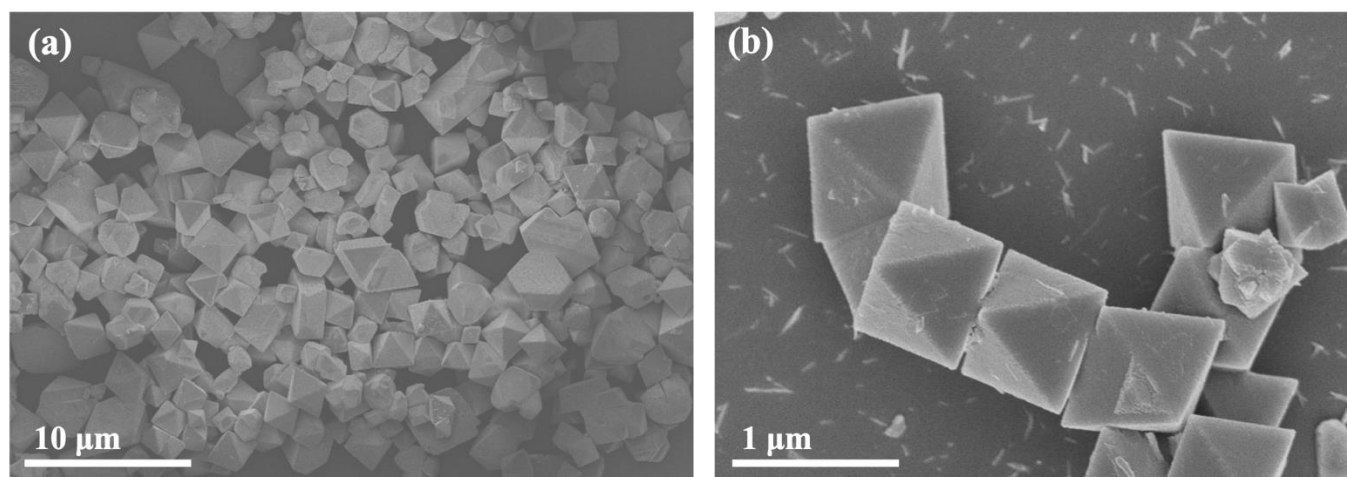

**Figure S1:** SEM image of  $\text{Cu}_3(\text{BTC})_2$  precursors.

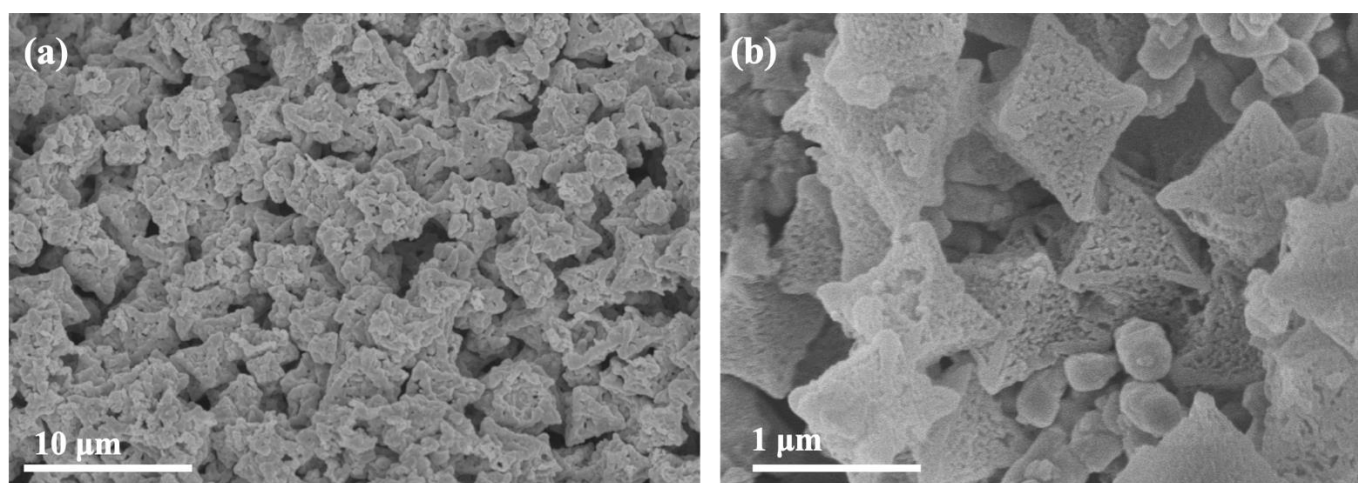

**Figure S2:** SEM image of CuO-NC.

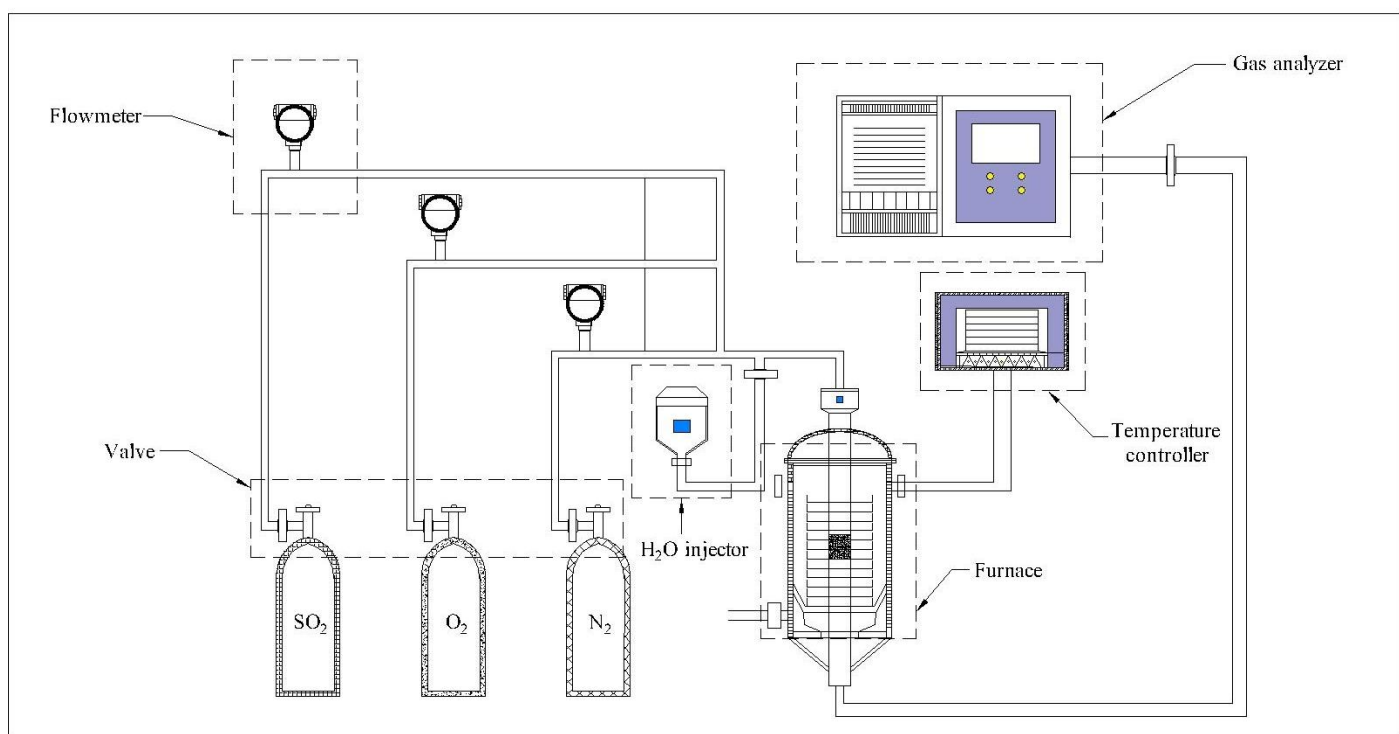

**Figure S3:** A schematic flow chart of dynamic adsorption desulfurization system.

**Table S1:** Porosity characteristics of nano-CuOs.

| Samples ID                                                                                                                                                                                                 | <sup>a</sup> S <sub>BET</sub><br>/m <sup>2</sup> g <sup>-1</sup> | <sup>b</sup> V <sub>tot</sub><br>/cm <sup>3</sup> g <sup>-1</sup> | <sup>c</sup> V <sub>meso</sub><br>/cm <sup>3</sup> g <sup>-1</sup> | <sup>d</sup> V <sub>micro</sub><br>/cm <sup>3</sup> g <sup>-1</sup> |
|------------------------------------------------------------------------------------------------------------------------------------------------------------------------------------------------------------|------------------------------------------------------------------|-------------------------------------------------------------------|--------------------------------------------------------------------|---------------------------------------------------------------------|
| CuO-NC                                                                                                                                                                                                     | 89.837                                                           | 0.256                                                             | 0.160                                                              | 0.096                                                               |
| CuO-NP                                                                                                                                                                                                     | 1.502                                                            | 0.00110                                                           | 0.000998                                                           | 0.000097                                                            |
| <sup>a</sup> S <sub>BET</sub> = BET surface area <sup>b</sup> V <sub>tot</sub> = Total pore volume<br><sup>c</sup> V <sub>meso</sub> = Mesopores volume <sup>d</sup> V <sub>micro</sub> = Micropore volume |                                                                  |                                                                   |                                                                    |                                                                     |
